# Supplementary material for: Hexacyclotetradecenes as polycyclic fused exo -norbornene monomers: synthesis of cyclic olefin copolymers via Ti-catalyzed controlled polymerization
Source: Royal Society of Chemistry journal article supplement (doi:10.1039/d4py00541d), 2024-01-01
Supplement: d4py00541d1.pdf [file d4py00541d1.pdf]

*Supporting information for*

**Hexacyclotetradecenes as polycyclic fused *exo*-norbornene monomers:  
Synthesis of cyclic olefin copolymers via Ti-catalyzed controlled  
polymerization**

Eri Funahashi, Yusuke Iwata, Shin-ichi Matsuoka\*

Department of Life Science and Applied Chemistry, Graduate School of Engineering,

Nagoya Institute of Technology

Gokiso-cho, Showa-ku, Nagoya, Aichi 466-8555, Japan

Corresponding Author: Shin-ichi Matsuoka

<http://orcid.org/0000-0001-7488-9971>

E-mail: [matsuoka.shinichi@nitech.ac.jp](mailto:matsuoka.shinichi@nitech.ac.jp)

Tel: +81-52-735-7254

## CONTENTS

|                                                                                                                                   |    |
|-----------------------------------------------------------------------------------------------------------------------------------|----|
| Table S1. Attempted ROMP of <b>1</b> .....                                                                                        | 3  |
| Figure S1. <sup>1</sup> H NMR spectrum of Binor-S.....                                                                            | 4  |
| Figure S2. <sup>13</sup> C NMR spectrum of Binor-S .....                                                                          | 4  |
| Figure S3. DEPT90 and DEPT135 NMR spectra of Binor-S .....                                                                        | 5  |
| Figure S4. <sup>1</sup> H- <sup>1</sup> H COSY NMR spectrum of Binor-S .....                                                      | 5  |
| Figure S5. HMQC NMR spectrum of Binor-S .....                                                                                     | 6  |
| Figure S6. <sup>13</sup> C INADEQUATE NMR spectrum of Binor-S .....                                                               | 6  |
| Figure S7. GC chromatogram of <b>1a</b> and <b>1b</b> .....                                                                       | 7  |
| Figure S8. <sup>1</sup> H NMR spectrum of <b>1a</b> and <b>1b</b> .....                                                           | 7  |
| Figure S9. <sup>13</sup> C NMR spectrum of <b>1a</b> and <b>1b</b> .....                                                          | 8  |
| Figure S10. DEPT135 NMR spectrum of <b>1a</b> and <b>1b</b> .....                                                                 | 8  |
| Figure S11. <sup>1</sup> H- <sup>1</sup> H COSY NMR spectrum of <b>1a</b> and <b>1b</b> (correlation of <b>1a</b> ) .....         | 9  |
| Figure S12. <sup>1</sup> H- <sup>1</sup> H COSY NMR spectrum of <b>1a</b> and <b>1b</b> (correlation of <b>1b</b> ).....          | 9  |
| Figure S13. HMQC NMR spectrum of <b>1a</b> and <b>1b</b> .....                                                                    | 10 |
| Figure S14. <sup>13</sup> C INADEQUATE NMR spectrum of <b>1a</b> and <b>1b</b> .....                                              | 10 |
| Figure S15. NOESY NMR spectrum of <b>1a</b> and <b>1b</b> (correlation of <b>1a</b> ).....                                        | 11 |
| Figure S16. NOESY NMR spectrum of <b>1a</b> and <b>1b</b> (correlation of <b>1b</b> ).....                                        | 11 |
| Figure S17. <sup>1</sup> H NMR spectra of poly <b>1</b> and poly( <b>1-co-1-octene</b> ).....                                     | 12 |
| Figure S18. SEC chromatograms of poly( <b>1-co-1-octene</b> ) (entries 4, 5, 7, and 8) and poly( <b>1-octene</b> ) (entry 6)..... | 13 |
| Figure S19. SEC chromatograms and molecular weight data of poly( <b>1-co-1-octene</b> ) (Figure 2C). .....                        | 14 |
| Figure S20. <sup>13</sup> C NMR spectrum of poly( <b>1-co-1-octene</b> ) (entry 8, Table 1) .....                                 | 14 |
| Figure S21. <sup>13</sup> C, DEPT90, and DEPT135 NMR spectrum of poly( <b>1-co-1-octene</b> ) (entry 7, Table 1).....             | 15 |
| Figure S22. DSC profile of poly <b>1</b> (entry 1, Table 1). .....                                                                | 16 |
| Figure S23. DSC profile of poly( <b>1-co-1-octene</b> ) (entry 4, Table 1). .....                                                 | 16 |
| Figure S24. DSC profile of poly( <b>1-co-1-octene</b> ) (entry 5, Table 1). .....                                                 | 17 |
| Figure S25. DSC profile of poly( <b>1-co-1-octene</b> ) (entry 8, Table 1). .....                                                 | 17 |
| Figure S26. UV-vis spectrum of poly( <b>1-co-1-octene</b> ) (thickness of 86 μm) (entry 4, Table 1).....                          | 18 |

Table S1. Attempted ROMP of **1**.

| entry | catalyst |      | solvent <sup>a</sup> | temp.<br>°C | time<br>h | yield <sup>b</sup><br>% |
|-------|----------|------|----------------------|-------------|-----------|-------------------------|
|       | type     | mol% |                      |             |           |                         |
| 1     | G1       | 1    | DCM                  | 25          | 18        | 0                       |
| 2     | G1       | 1    | toluene              | 25          | 18        | 0                       |
| 3     | G2       | 1    | toluene              | 25          | 18        | 0                       |
| 4     | G2       | 1    | bulk                 | -20         | 18        | 0                       |
| 5     | G2       | 10   | toluene              | 25          | 72        | 0                       |
| 6     | G3       | 1    | toluene              | 25          | 18        | 0                       |
| 7     | G3       | 1    | bulk                 | 25          | 18        | 0                       |
| 8     | G3       | 1    | bulk                 | -20         | 18        | 0                       |
| 9     | G3       | 10   | toluene              | 25          | 72        | 0                       |
| 10    | HG2      | 1    | DCM                  | 25          | 18        | 0                       |
| 11    | HG2      | 2    | toluene              | 40          | 18        | 0                       |

<sup>a</sup>[**1**] = 0.25 M (in toluene and in DCM). <sup>b</sup>after reprecipitation into MeOH

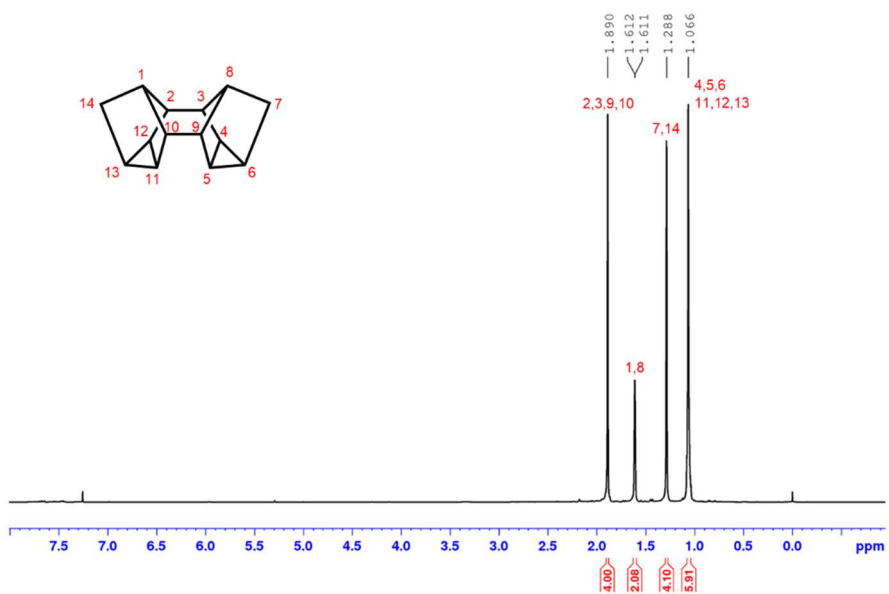

Figure S1. <sup>1</sup>H NMR spectrum of Binor-S

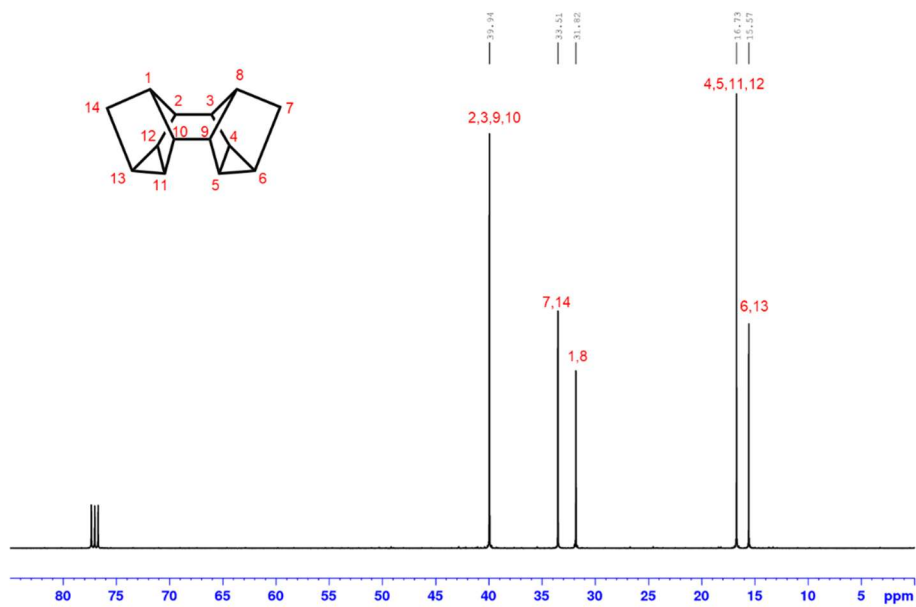

Figure S2. <sup>13</sup>C NMR spectrum of Binor-S

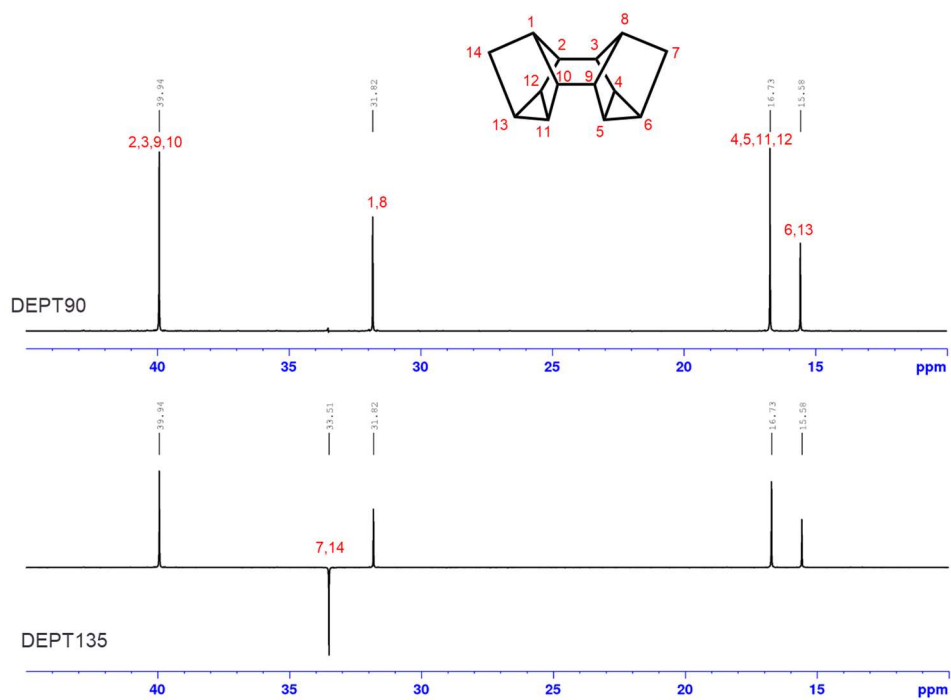

Figure S3. DEPT90 and DEPT135 NMR spectra of Binor-S

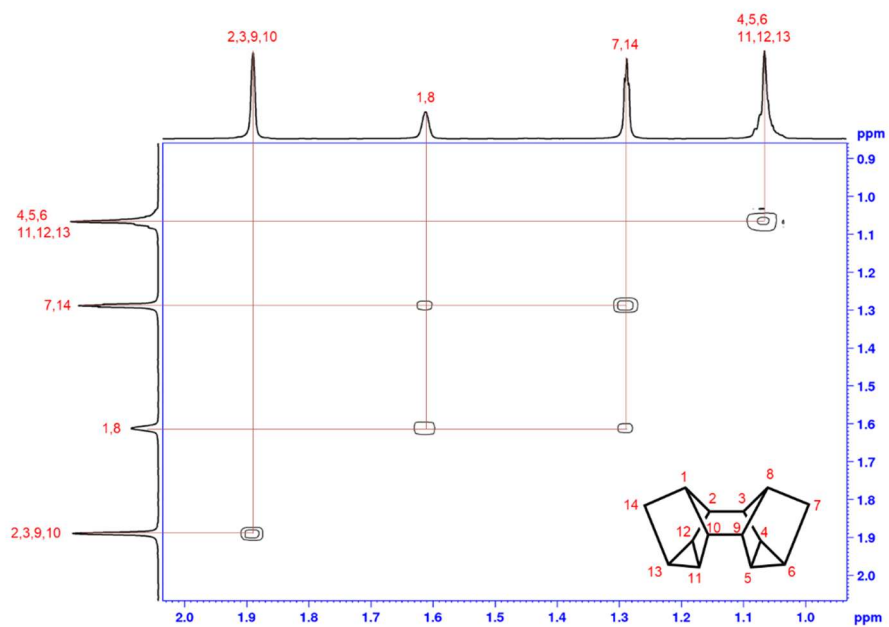

Figure S4.  $^1\text{H}$ - $^1\text{H}$  COSY NMR spectrum of Binor-S

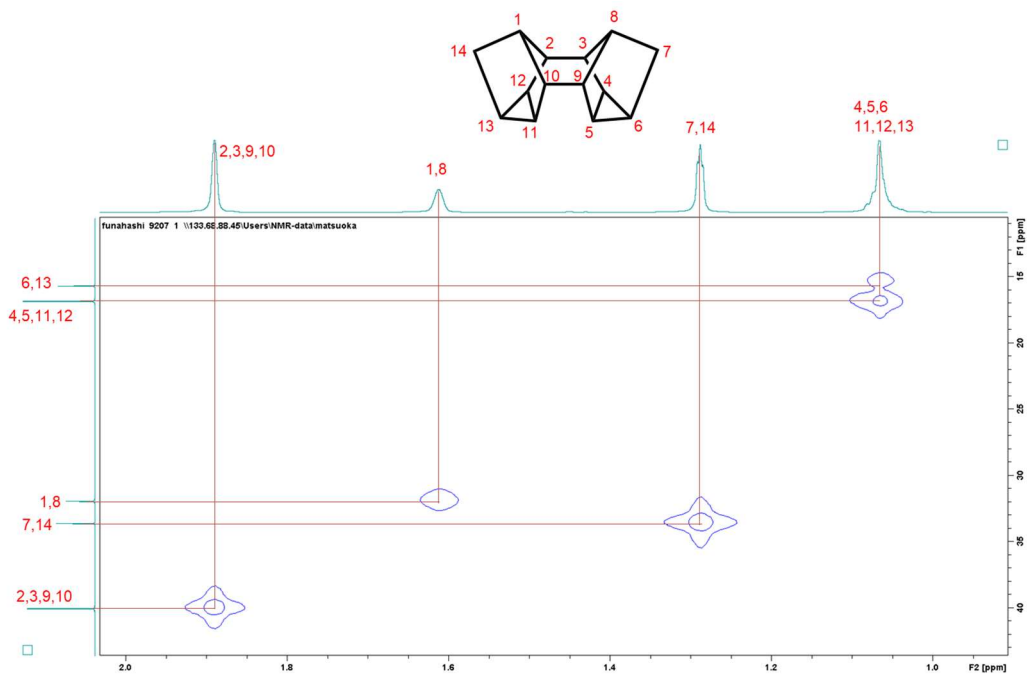

Figure S5. HMQC NMR spectrum of Binor-S

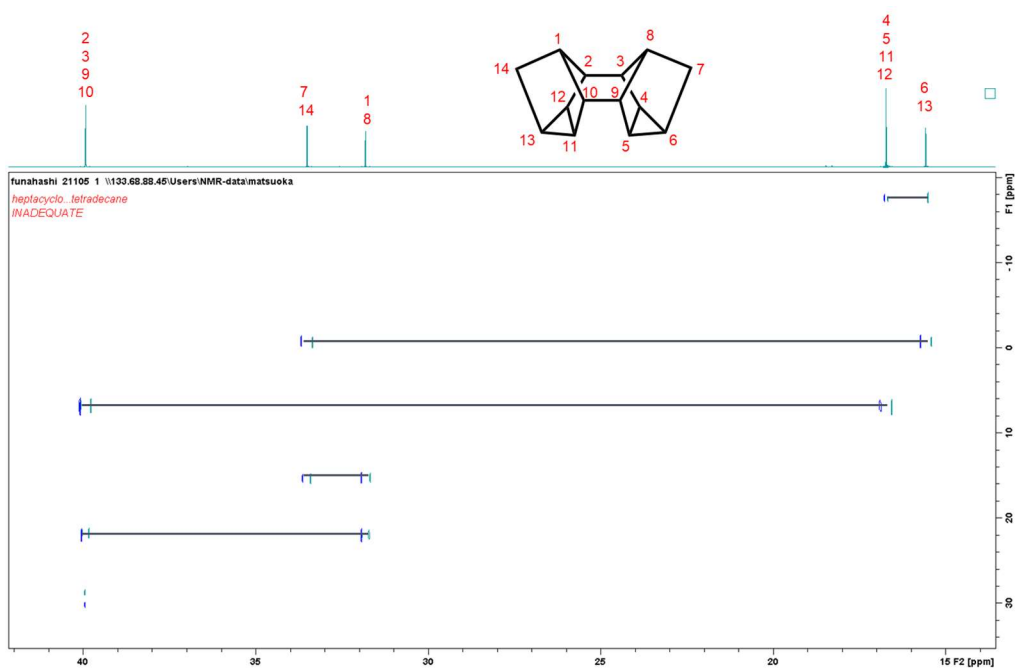

Figure S6.  $^{13}\text{C}$  INADEQUATE NMR spectrum of Binor-S

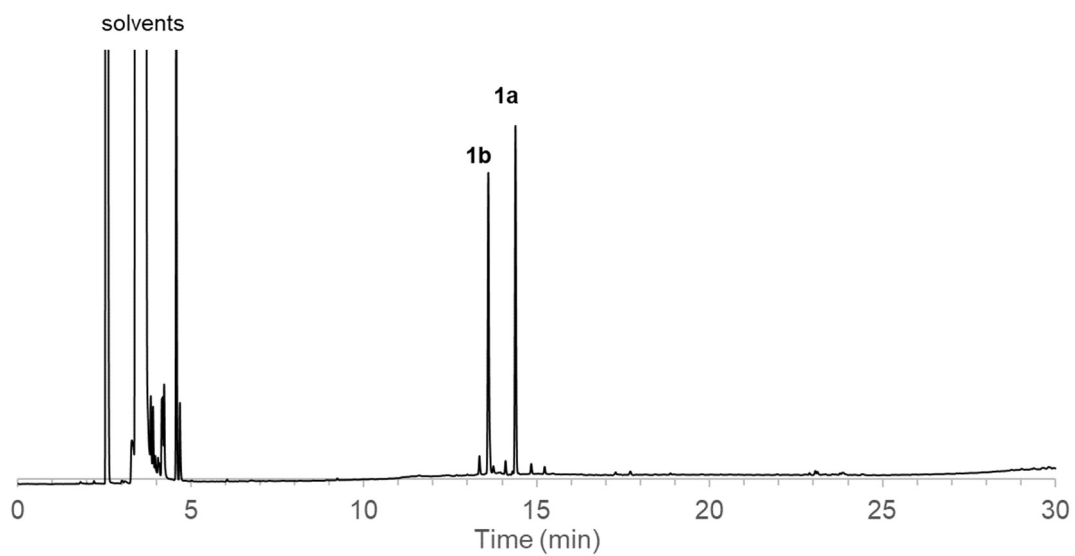

Figure S7. GC chromatogram of **1a** and **1b**.

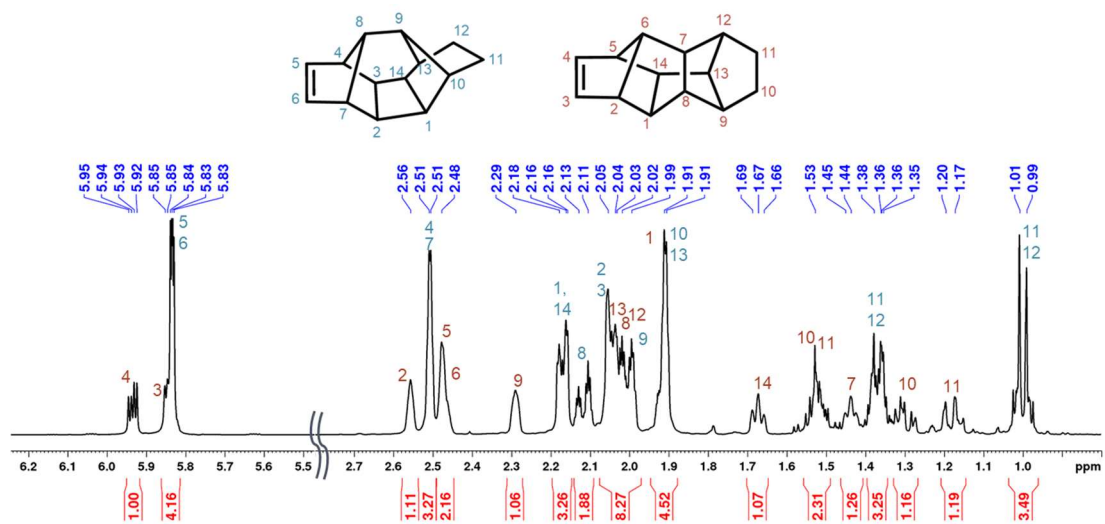

Figure S8.  $^1\text{H}$  NMR spectrum of **1a** and **1b**

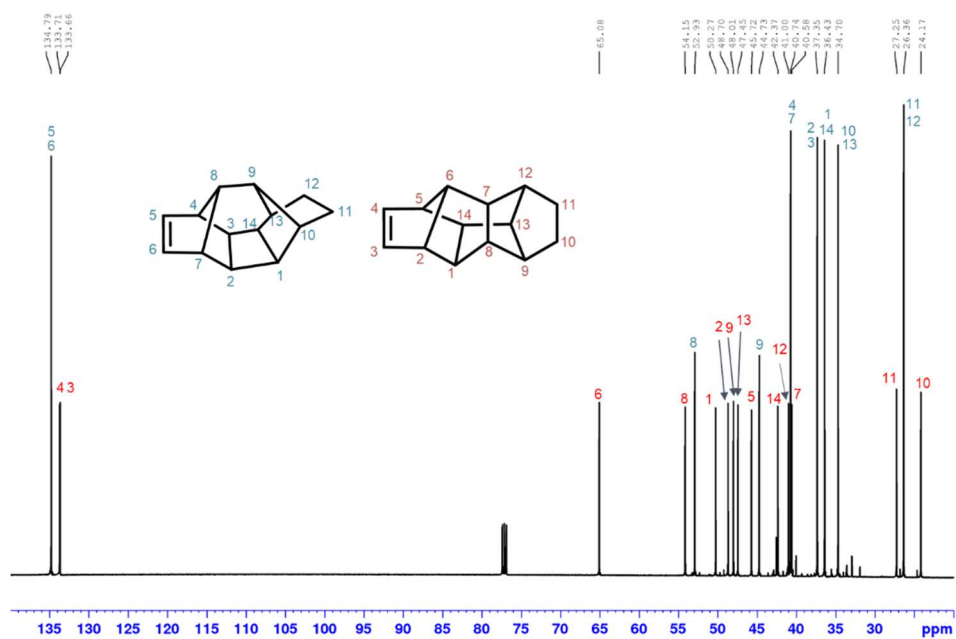

Figure S9.  $^{13}\text{C}$  NMR spectrum of **1a** and **1b**

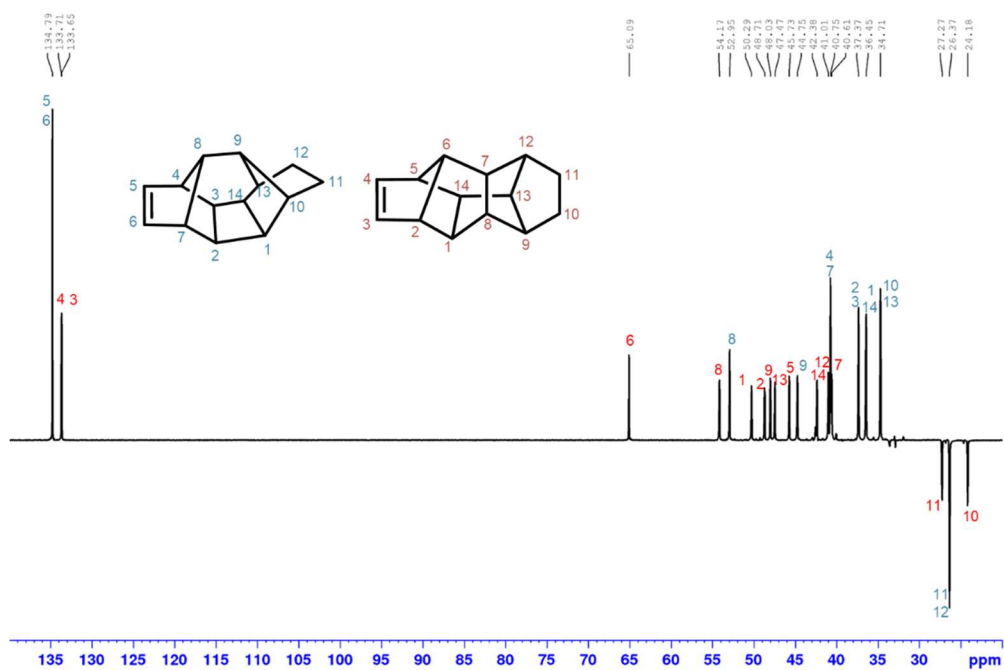

Figure S10. DEPT135 NMR spectrum of **1a** and **1b**



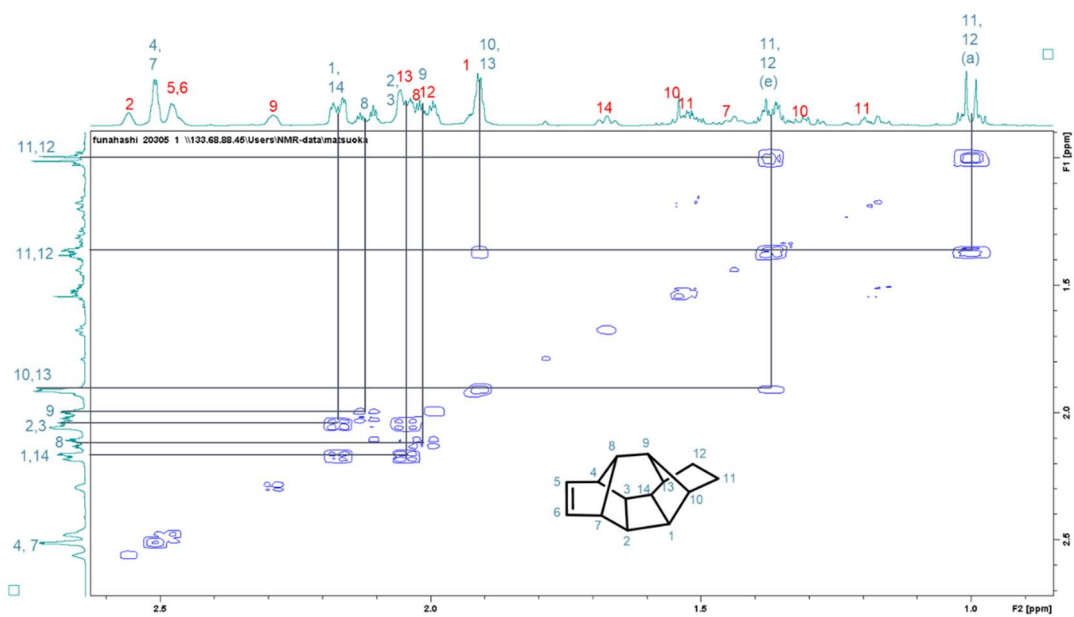

Figure S11.  $^1\text{H}$ - $^1\text{H}$  COSY NMR spectrum of **1a** and **1b** (correlation of **1a**)

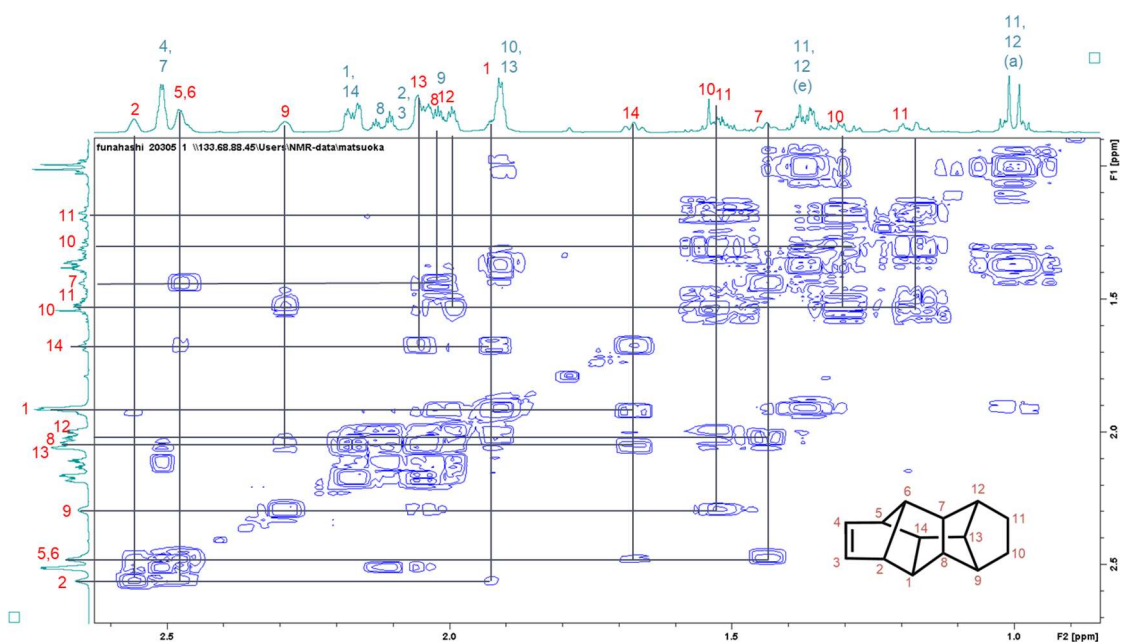

Figure S12.  $^1\text{H}$ - $^1\text{H}$  COSY NMR spectrum of **1a** and **1b** (correlation of **1b**)

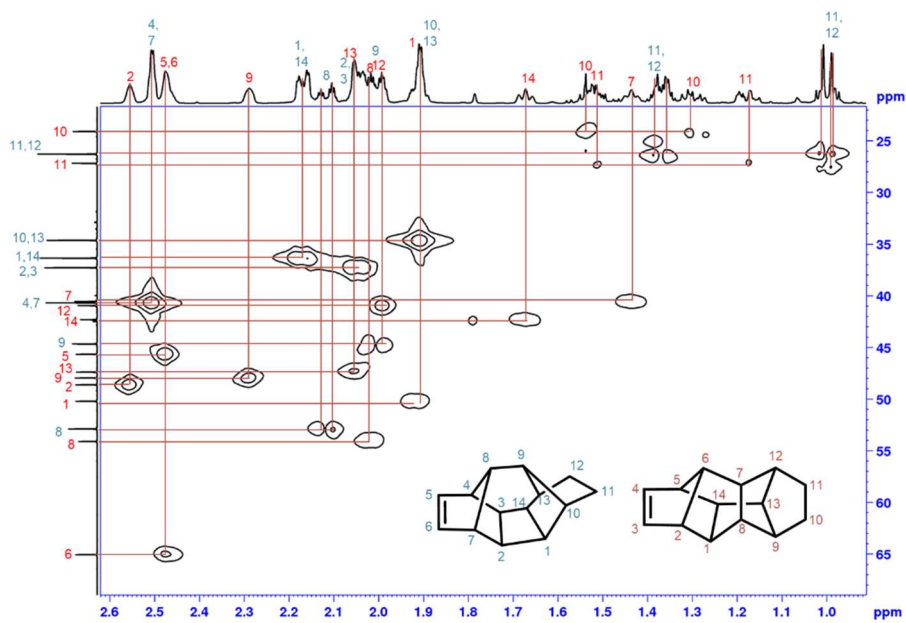

Figure S13. HMQC NMR spectrum of **1a** and **1b**

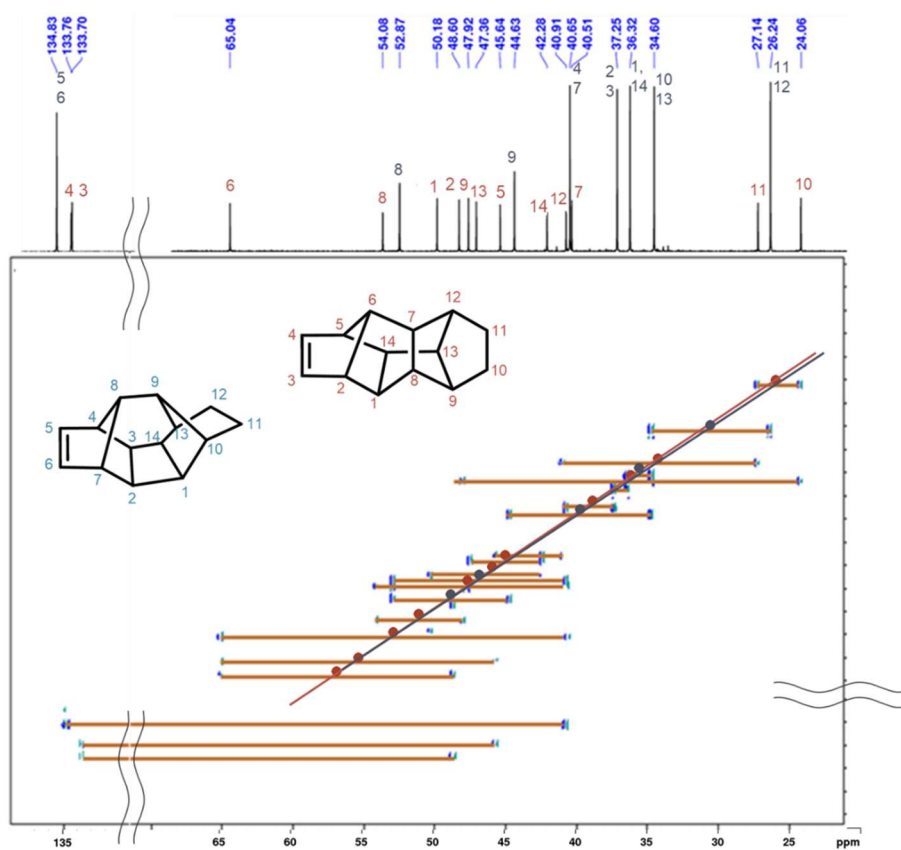

Figure S14.  $^{13}\text{C}$  INADEQUATE NMR spectrum of **1a** and **1b**

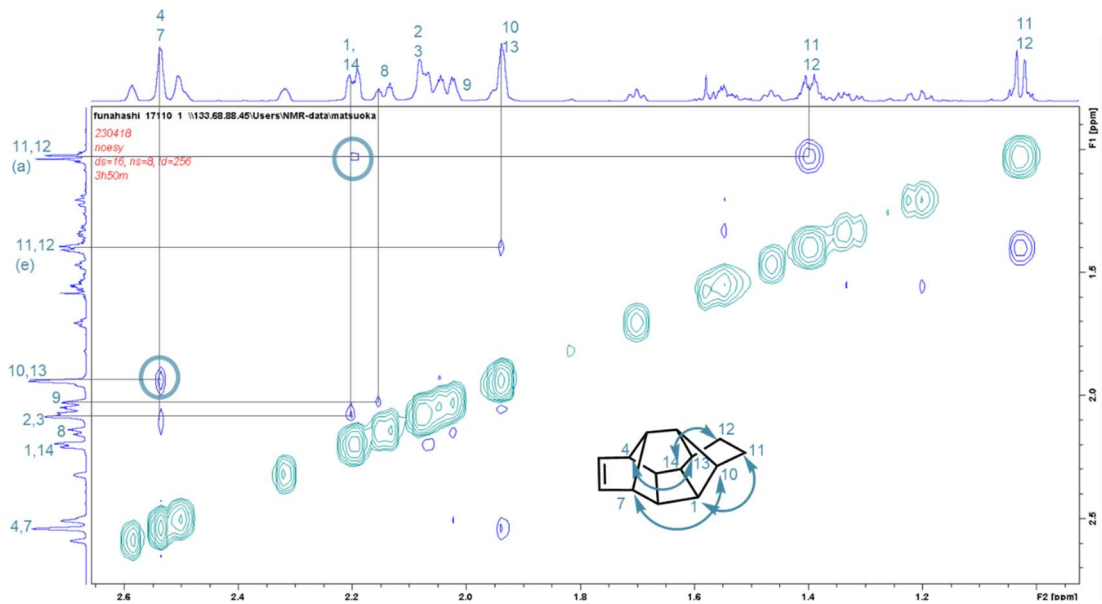

Figure S15. NOESY NMR spectrum of **1a** and **1b** (correlation of **1a**)

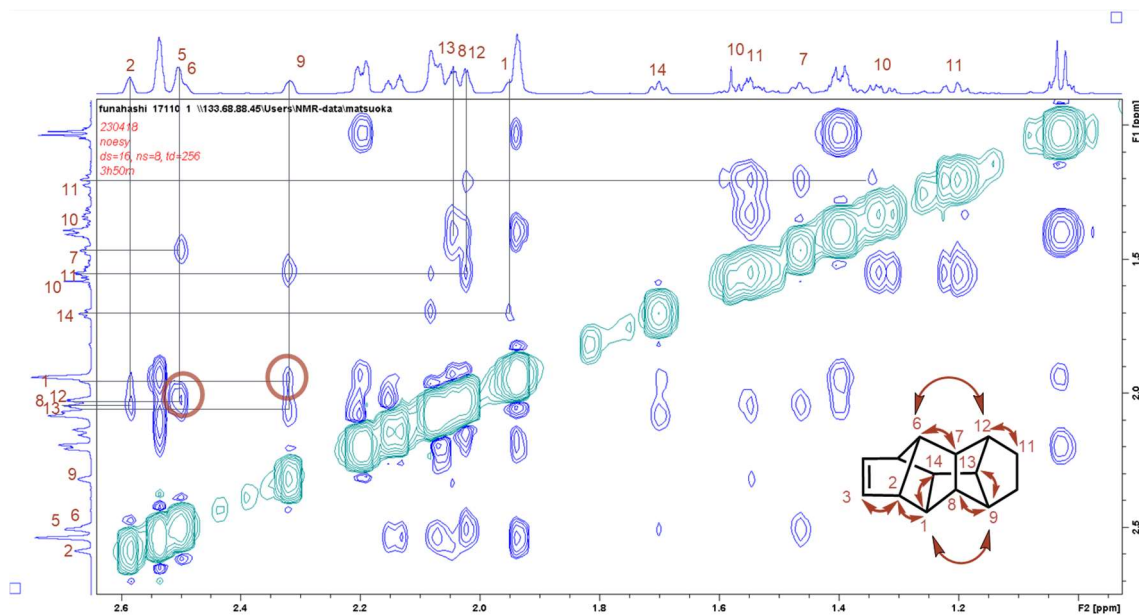

Figure S16. NOESY NMR spectrum of **1a** and **1b** (correlation of **1b**)

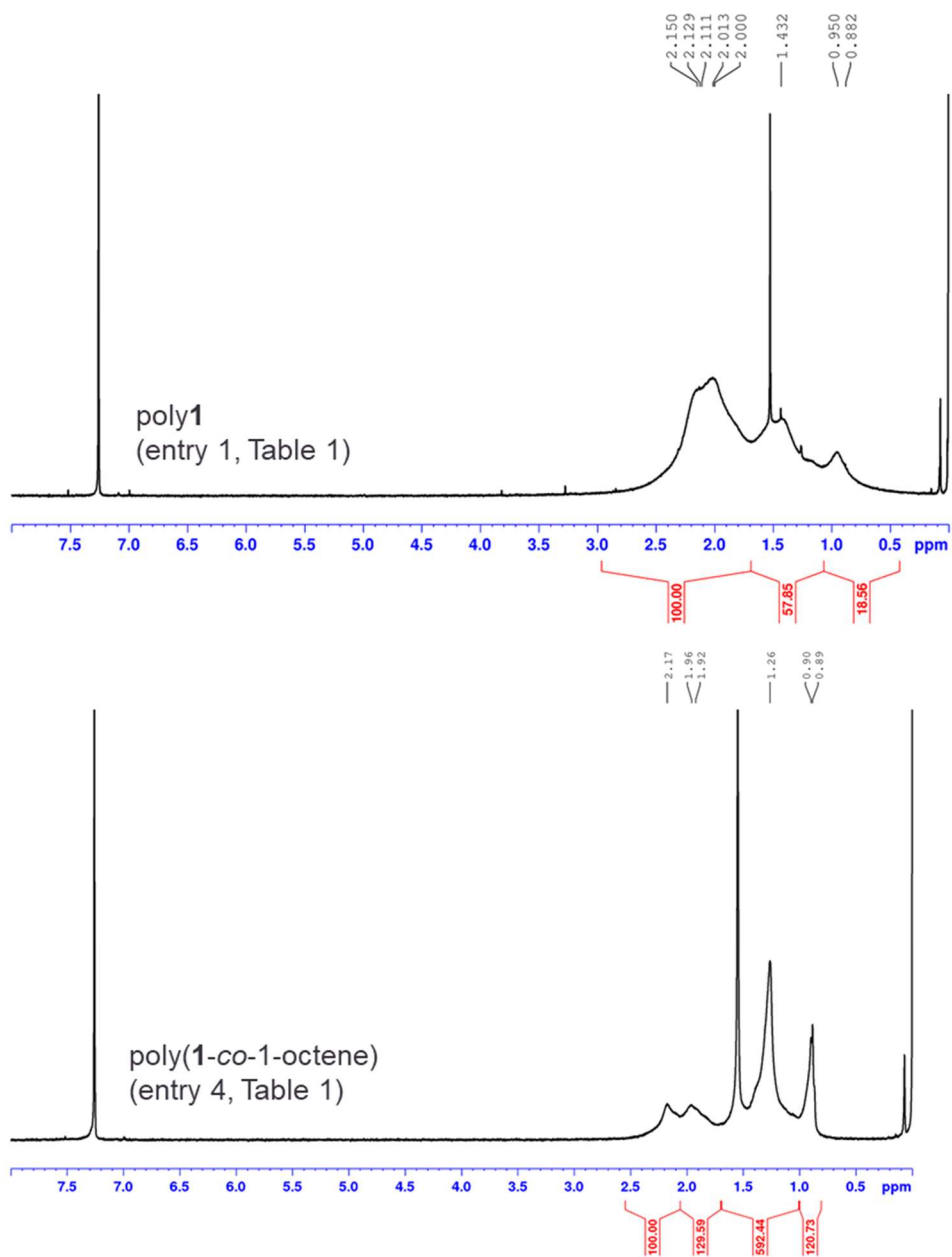

Figure S17.  $^1\text{H}$  NMR spectra of poly1 and poly(1-co-1-octene)

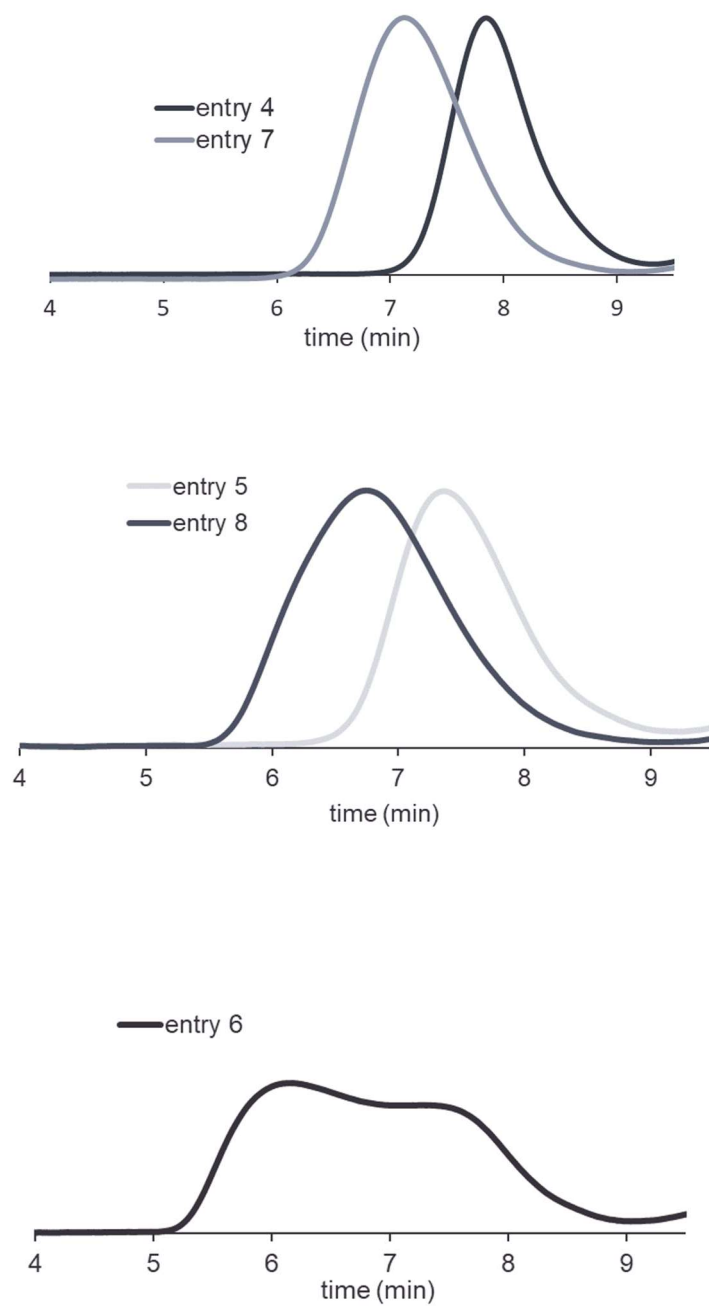

Figure S18. SEC chromatograms of poly(**1-co-1**-octene) (entries 4, 5, 7, and 8) and poly(1-octene) (entry 6).

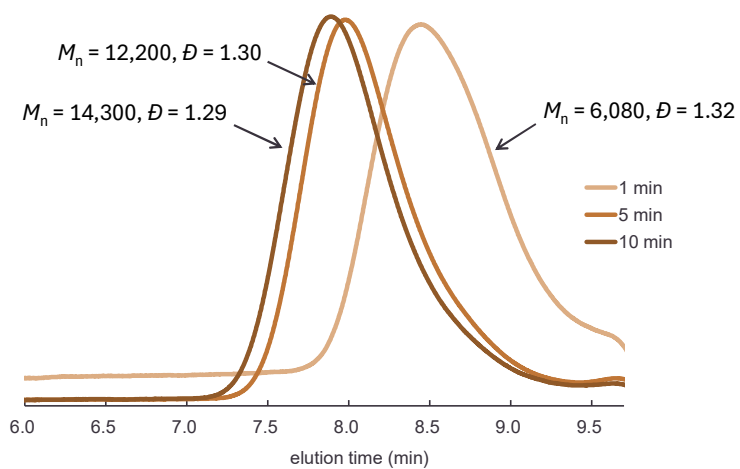

Figure S19. SEC chromatograms and molecular weight data of poly(**1-co-1-octene**) (Figure 2C).

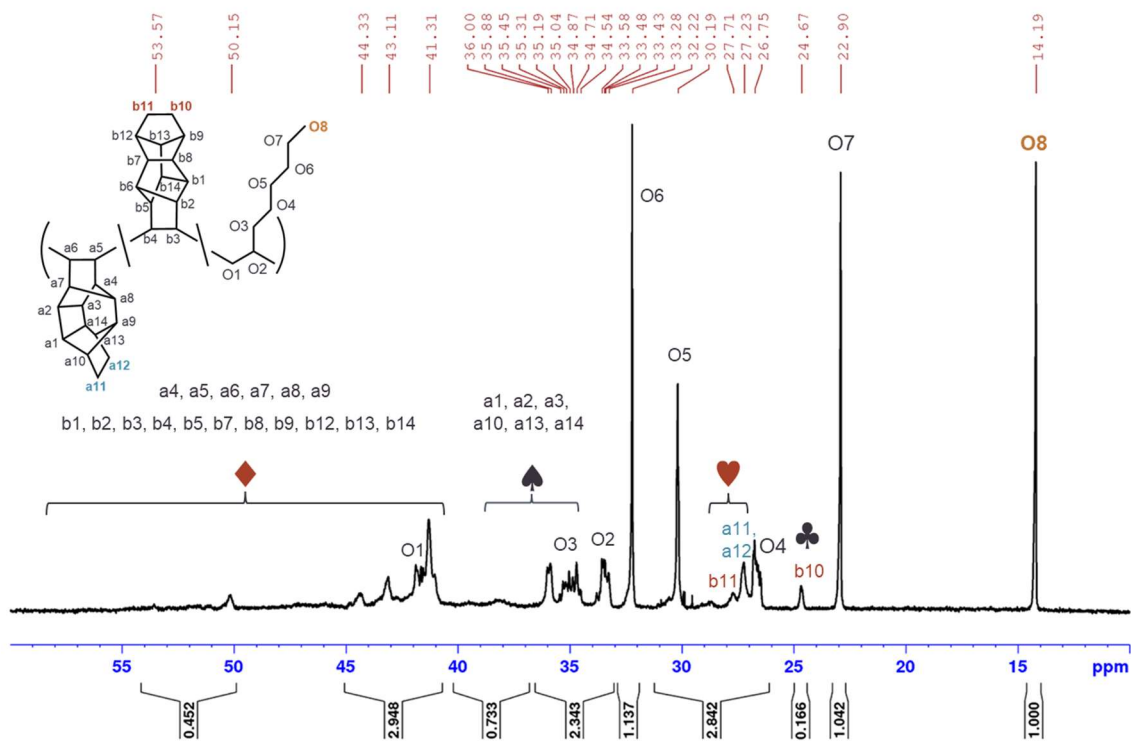

Figure S20.  $^{13}\text{C}$  NMR spectrum of poly(**1-co-1-octene**) (entry 8, Table 1)

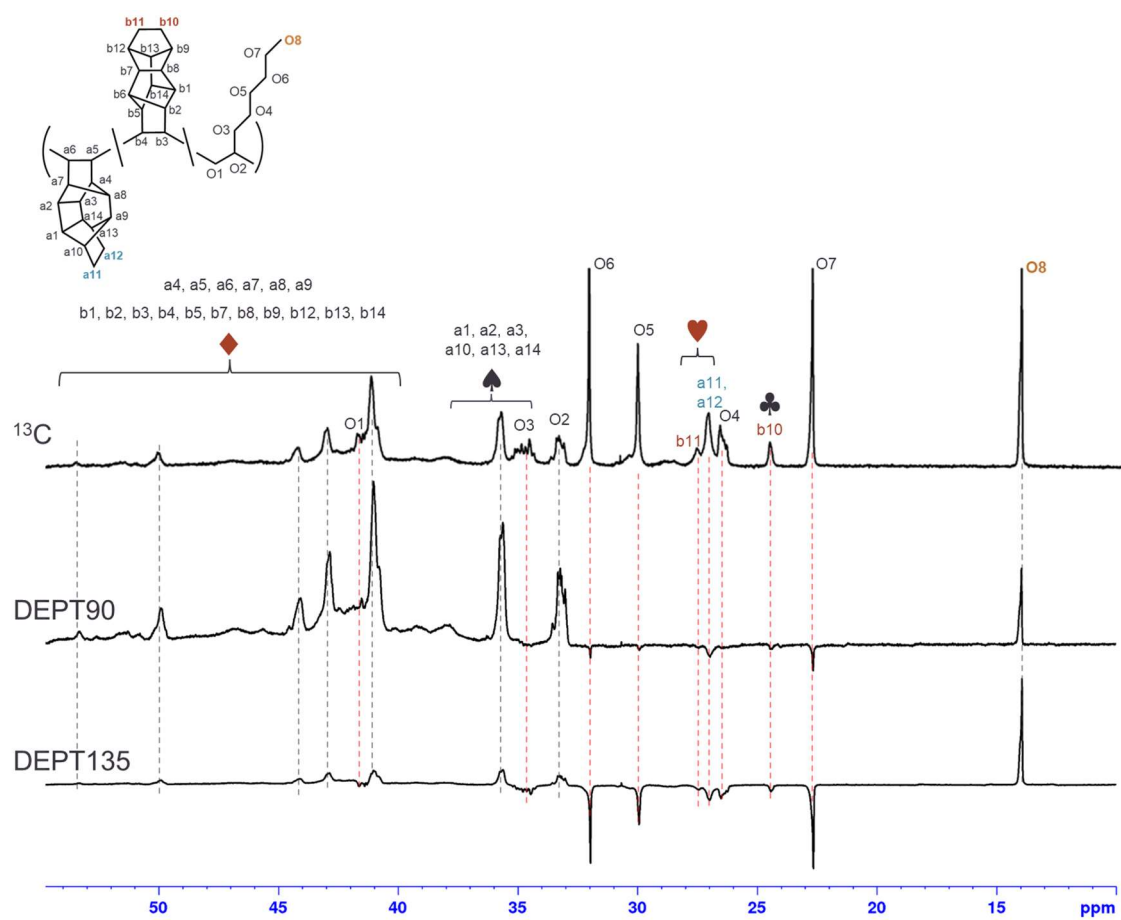

Figure S21.  $^{13}\text{C}$ , DEPT90, and DEPT135 NMR spectrum of poly(1-co-1-octene) (entry 7, Table 1)

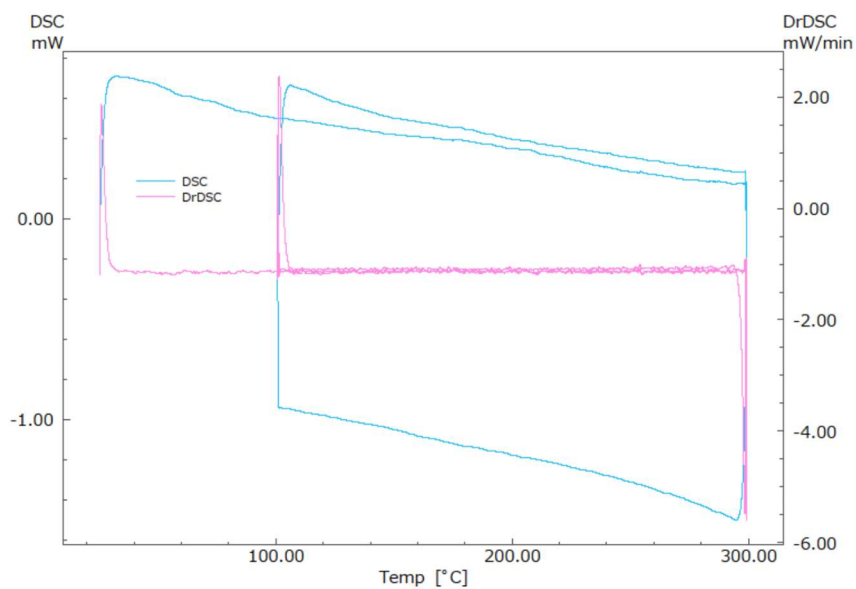

Figure S22. DSC profile of poly1 (entry 1, Table 1).

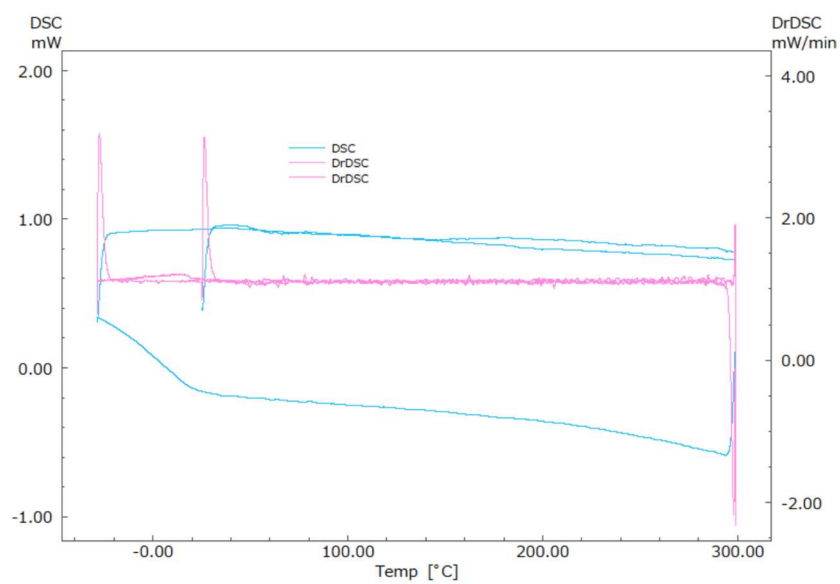

Figure S23. DSC profile of poly(1-co-1-octene) (entry 4, Table 1).



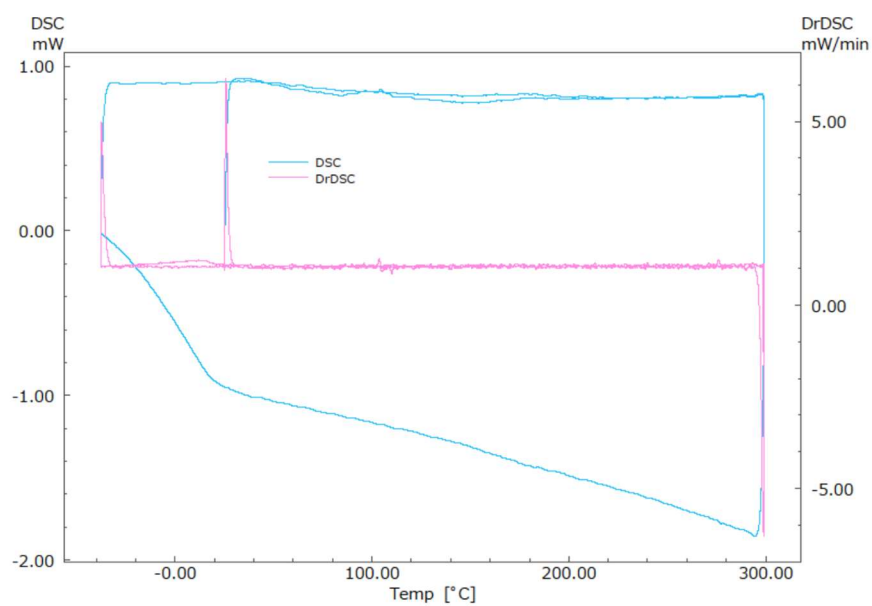

Figure S24. DSC profile of poly(1-co-1-octene) (entry 5, Table 1).

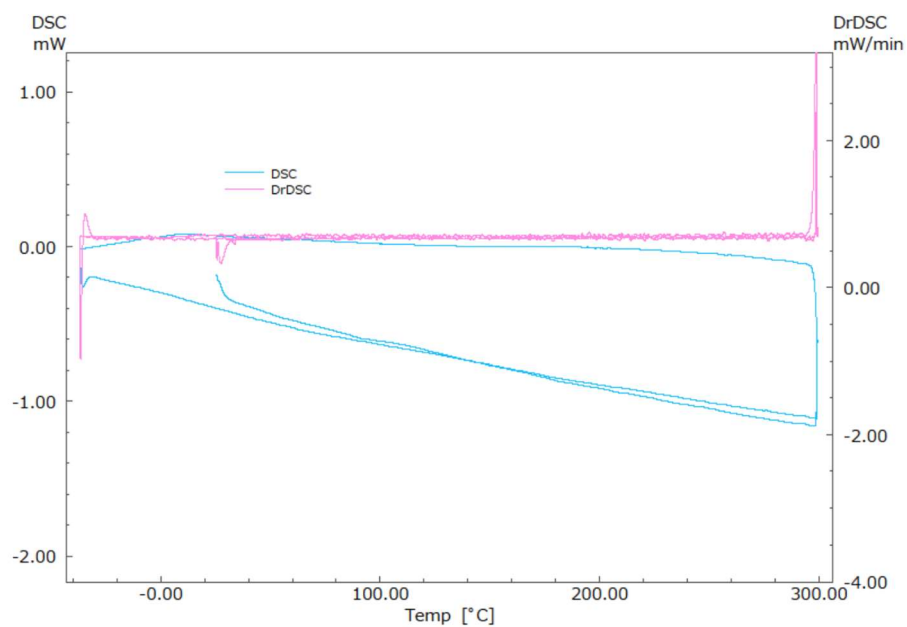

Figure S25. DSC profile of poly(1-co-1-octene) (entry 8, Table 1).

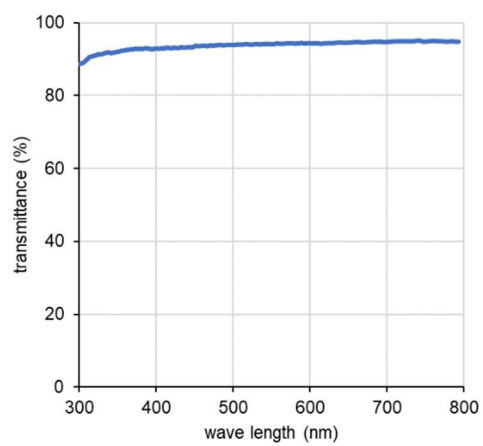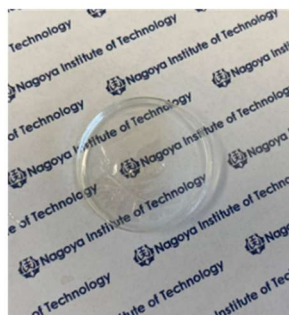

Figure S26. UV-vis spectrum of poly(1-co-1-octene) (thickness of 86 μm) (entry 4, Table 1)
